# Supplementary material for: Practitioner Opinion on Contralateral Prophylactic Mastectomy: How Do We Steer a Patient-Driven Discussion?
Source: Springer Nature journal article supplement (doi:10.1245/s10434-019-07432-6), 2019-06-11
Supplement: MOESM1 [file 16797292]

**Appendix A: Contralateral Prophylactic Mastectomy Practitioner Needs Assessment Questionnaire**

1. What surgical decisions do patients with unilateral breast cancer have to make in your practice?

2. What discussions do you have with your patients regarding the contralateral breast?

3. Let’s focus on the decision to proceed with a contralateral prophylactic mastectomy. How does this discussion start in your clinic?

4. Let’s talk about the difficulty people have making the decision about CPM. How do you think patients feel when making this decision?

**Do patients feel:**

- Unsure about what to do?
- Worried what could go wrong?
- Distressed or upset?
- Constantly thinking about the decision?
- Wavering between choices or changing their mind?
- Delaying the decision?
- Questioning what is important to them?
- Physical signs of stress? (tense muscles, racing heartbeat, difficulty sleeping)

5.What makes the decision difficult for patients?

**Are patients:**

- Unsure about what to do?
- Lacking information about options, benefits, risks?
- Lacking information on the chances of benefits and harms?
- Confused from information overload?
- Unclear about what is important to them?
- Feeling unsupported in decision making?
- Feeling pressure from others?
- Lacking motivation or not feeling ready to make a decision?
- Lacking the ability or skill to make a decision?

6. What do you see as the main advantages/benefits and disadvantages/risks of proceeding with a CPM?

7. What is your usual role in decision making?

**Do you usually:**

- Make the decision for the patients?
- Share the decision with the patients?
- Provide support or advice for patients to the decision on their own?

8. What factors make it difficult for you to support your patients’ decision making for CPM?

9. What factors make it easier for you to support your patients’ decision making for CPM?

10. Who else besides yourself and the patient is usually involved in making this decision?

- Spouse
- Family
- Friend
- Health care provider
- Other, specify

11. What is their usual role in making this decision (i.e. the person mentioned above)?

**Do they usually:**

- Make the decision for the patient?
- Share the decision with the patient?
- Provide support or advice for patients to make the decision on their own?
- Don’t know
- Other, specify

12. How do patient usually go about making such a decision?

**Do they:**

- Get information on options?
- Get information on the chances of benefits and risks?
- Consider the personal importance of the benefits and risks?
- Get information on how others go about deciding?
- Get support from others?
- Find ways to handle pressure?

13. What would help patients to make this decision?

14. What will hinder patients (get in the way of) making this decision?

15. Is there anything else that would help overcome barriers to decision making?

16. I will list possible ways to help some people with a decision, which ones do you think might be useful to your patients?

Counseling from a health practitioner

- IF YES, specify what types

Discussion groups of people facing the same decision

- IF YES, specify what type of organization or group

Information materials

- IF YES, specify content
  - Health condition
  - Options
  - Benefits
  - Risks
  - Probabilities of benefits/risks
  - Help considering the personal importance of benefits versus risks
  - Guidance in the steps of deliberation and communication
  - Other, specify
- IF YES, specify format
  - Booklet, pamphlets
  - Internet
  - Videos/DVDs
  - Other, specify

17. Is there anything else that would help you to do a better job supporting your patients’ decision making?
